# Supplementary material for: Interaction of healthcare worker hands and portable medical equipment: a sequence analysis to show potential transmission opportunities
Source: BMC Infect Dis. 2017 Dec 28;17:800. doi: 10.1186/s12879-017-2895-6 (PMC5745722; doi:10.1186/s12879-017-2895-6)
Supplement: Additional file 1: — Room Observation Template. (XLSX 11 kb) [file 12879_2017_2895_MOESM1_ESM.xlsx]

## Sheet: Sheet1
Room Observation Template									Room #						Entry Time (HHMM):
																Date (MMDD):
	Patient	Bed Surface	Bedrail	Over-Bed Table	Bedside Table	Call Button	Other	Vitals	COW	IV Pump	Other	Entry	Used PME as a tray table	Patient Use	Observe Data	Reposition	Exit	Other	Disinfection Time	Disinfectant Type	Gloves	Hand Sanitizer / Soap
#	High Touch Surface Contact							PME Contact				PME Use										HH	Special Notes
1
2
3
4
5
6
7
8
9
10
11
12
13
14
15
16
17
18
19
Exit Time (HHMM):
